# Supplementary material
Source: PubMed Central journal article supplement (PMC3096014)
Supplement: NIHMS280309-supplement-1_si_001.pdf [file NIHMS280309-supplement-1_si_001.pdf]

**TABLE S1a Houghten et. al.<sup>13</sup>**

| Mixture                     |  | IC <sub>50</sub> uM       | Mixture                     |                 |
|-----------------------------|--|---------------------------|-----------------------------|-----------------|
| Ac-DVXXXX-NH2               |  | 250                       |                             | Ac-DVPXXX-NH2   |
| <b>Constituent Mixtures</b> |  | <b>IC<sub>50</sub> uM</b> | <b>Constituent Mixtures</b> |                 |
| Ac-DVPXXX-NH2               |  | 41                        |                             | Ac-DVPDXX-NH2   |
| Ac-DVEXXX-NH2               |  | 146                       |                             | Ac-DVPAXX-NH2   |
| Ac-DVQXXX-NH2               |  | 215                       |                             | Ac-DVPEXX-NH2   |
| Ac-DVMXXX-NH2               |  | 451                       |                             | Ac-DVPFXX-NH2   |
| Ac-DVRXXX-NH2               |  | 906                       |                             | Ac-DVPGXX-NH2   |
| Ac-DVAXXX-NH2               |  | 1,107                     |                             | Ac-DVPHXX-NH2   |
| Ac-DVDXXX-NH2               |  | 1,400                     |                             | Ac-DVPIXX-NH2   |
| Ac-DVFXXX-NH2               |  | 1,400                     |                             | Ac-DVPKXX-NH2   |
| Ac-DVGXXX-NH2               |  | 1,400                     |                             | Ac-DVPLXX-NH2   |
| Ac-DVHXXX-NH2               |  | 1,400                     |                             | Ac-DVPMXX-NH2   |
| Ac-DVIXXX-NH2               |  | 1,400                     |                             | Ac-DVPNXX-NH2   |
| Ac-DVKXXX-NH2               |  | 1,400                     |                             | Ac-DVPPXX-NH2   |
| Ac-DVLXXX-NH2               |  | 1,400                     |                             | Ac-DVPQXX-NH2   |
| Ac-DVNXXX-NH2               |  | 1,400                     |                             | Ac-DVPRXX-NH2   |
| Ac-DVSXXX-NH2               |  | 1,400                     |                             | Ac-DVPSXX-NH2   |
| Ac-DVTXXX-NH2               |  | 1,400                     |                             | Ac-DVPTXX-NH2   |
| Ac-DVVXXX-NH2               |  | 1,400                     |                             | Ac-DVPVXX-NH2   |
| Ac-DVYXXX-NH2               |  | 1,400                     |                             | Ac-DVPYXX-NH2   |
|                             |  | Predicted Value           | Scaled Error                |                 |
| Arithmetic Mean             |  | 1,093                     | 3.37                        | Arithmetic Mean |
| Geometric Mean              |  | 827                       | 2.31                        | Geometric Mean  |
| Harmonic Mean               |  | 370                       | 0.48                        | Harmonic Mean   |

**TABLE S1b Dooley et. al.<sup>14</sup>**

| Mixture                     |  | IC <sub>50</sub> nM       | Mixture                     |                           |
|-----------------------------|--|---------------------------|-----------------------------|---------------------------|
| Ac-rfxxxx-NH <sub>2</sub>   |  | 14,000                    |                             | Ac-rfwxxx-NH <sub>2</sub> |
| <b>Constituent Mixtures</b> |  | <b>IC<sub>50</sub> nM</b> | <b>Constituent Mixtures</b> |                           |
| Ac-rfwxxx-NH <sub>2</sub>   |  | 900                       |                             | Ac-rfwvxx-NH <sub>2</sub> |
| Ac-rffxxx-NH <sub>2</sub>   |  | 2,000                     |                             | Ac-rfwixx-NH <sub>2</sub> |
| Ac-rfhxxx-NH <sub>2</sub>   |  | 2,400                     |                             | Ac-rfwlxx-NH <sub>2</sub> |
| Ac-rfyxxx-NH <sub>2</sub>   |  | 2,500                     |                             | Ac-rfwmxx-NH <sub>2</sub> |
| Ac-rfixxx-NH <sub>2</sub>   |  | 5,500                     |                             | Ac-rfwfxx-NH <sub>2</sub> |
| Ac-rfvxxx-NH <sub>2</sub>   |  | 6,900                     |                             | Ac-rfwyxx-NH <sub>2</sub> |
| Ac-rfmxxx-NH <sub>2</sub>   |  | 12,000                    |                             | Ac-rfwrxx-NH <sub>2</sub> |
| Ac-rfxxxx-NH <sub>2</sub>   |  | 12,000                    |                             | Ac-rfwsxx-NH <sub>2</sub> |
| Ac-rflxxx-NH <sub>2</sub>   |  | 13,000                    |                             | Ac-rfwgxx-NH <sub>2</sub> |

|                           |        |              |                           |
|---------------------------|--------|--------------|---------------------------|
| Ac-rfsxxx-NH <sub>2</sub> | 14,000 |              | Ac-rfwhxx-NH <sub>2</sub> |
| Ac-rfrxxx-NH <sub>2</sub> | 15,000 |              | Ac-rfwpxx-NH <sub>2</sub> |
| Ac-rftxxx-NH <sub>2</sub> | 21,000 |              | Ac-rfwaxx-NH <sub>2</sub> |
| Ac-rfnxxx-NH <sub>2</sub> | 21,000 |              | Ac-rfwvxx-NH <sub>2</sub> |
| Ac-rfqxxx-NH <sub>2</sub> | 23,000 |              | Ac-rfwtxx-NH <sub>2</sub> |
| Ac-rfkxxx-NH <sub>2</sub> | 23,000 |              | Ac-rfwqxx-NH <sub>2</sub> |
| Ac-rfdxxx-NH <sub>2</sub> | 50,000 |              | Ac-rfwkxx-NH <sub>2</sub> |
| Ac-rfexxx-NH <sub>2</sub> | 68,000 |              | Ac-rfwnxx-NH <sub>2</sub> |
| Ac-rfpxxx-NH <sub>2</sub> | 69,000 |              | Ac-rfwexx-NH <sub>2</sub> |
| Ac-rfgxxx-NH <sub>2</sub> | 69,000 |              | Ac-rfwdx-NH <sub>2</sub>  |
| Predicted Value           |        | Scaled Error |                           |
| Arithmetic Mean           | 22,642 | 0.62         | Arithmetic Mean           |
| Geometric Mean            | 12,414 | 0.11         | Geometric Mean            |
| Harmonic Mean             | 5,618  | 0.60         | Harmonic Mean             |

TABLE S1c Dooley et. al.<sup>15</sup>

| Mixture                     | IC <sub>50</sub> nM | Mixture                   |
|-----------------------------|---------------------|---------------------------|
| Ac-RFXXXX-NH <sub>2</sub>   | 2,701               | Ac-RFMXXX-NH <sub>2</sub> |
| <b>Constituent Mixtures</b> |                     |                           |
| Ac-RFMXXX-NH <sub>2</sub>   | 723                 | Ac-RFMWXX-NH <sub>2</sub> |
| Ac-RFLXXX-NH <sub>2</sub>   | 1,252               | Ac-RFMSXX-NH <sub>2</sub> |
| Ac-RFIXXX-NH <sub>2</sub>   | 1,432               | Ac-RFMAXX-NH <sub>2</sub> |
| Ac-RFWXXX-NH <sub>2</sub>   | 3,009               | Ac-RFMGXX-NH <sub>2</sub> |
| Ac-RFFXXX-NH <sub>2</sub>   | 3,031               | Ac-RFMIXX-NH <sub>2</sub> |
| Ac-RFGXXX-NH <sub>2</sub>   | 4,484               | Ac-RFMVXX-NH <sub>2</sub> |
| Ac-RFYXXX-NH <sub>2</sub>   | 7,204               | Ac-RFMMXX-NH <sub>2</sub> |
| Ac-RFHXXX-NH <sub>2</sub>   | 7,296               | Ac-RFMRXX-NH <sub>2</sub> |
| Ac-RFNXXX-NH <sub>2</sub>   | 7,377               | Ac-RFMHXX-NH <sub>2</sub> |
| Ac-RFRXXX-NH <sub>2</sub>   | 7,980               | Ac-RFMTXX-NH <sub>2</sub> |
| Ac-RFQXXX-NH <sub>2</sub>   | 11,519              | Ac-RFMNXX-NH <sub>2</sub> |
| Ac-RFTXXX-NH <sub>2</sub>   | 11,561              | Ac-RFMKXX-NH <sub>2</sub> |
| Ac-RFAXXX-NH <sub>2</sub>   | 12,972              | Ac-RFMQXX-NH <sub>2</sub> |
| Ac-RFKXXX-NH <sub>2</sub>   | 14,003              | Ac-RFMYXX-NH <sub>2</sub> |
| Ac-RFSXXX-NH <sub>2</sub>   | 14,145              | Ac-RFMDXX-NH <sub>2</sub> |
| Ac-RFPXXX-NH <sub>2</sub>   | 23,895              | Ac-RFMFXX-NH <sub>2</sub> |
| Ac-RFVXXX-NH <sub>2</sub>   | 30,282              | Ac-RFMLXX-NH <sub>2</sub> |
| Ac-RFDXXX-NH <sub>2</sub>   | 44,588              | Ac-RFMPXX-NH <sub>2</sub> |
| Ac-RFEXXX-NH <sub>2</sub>   | 77,533              | Ac-RFMEXX-NH <sub>2</sub> |
| Predicted Value             |                     | Scaled Error              |
| Arithmetic Mean             | 14,962              | 4.54                      |
| Geometric Mean              | 7,989               | 1.96                      |
| Harmonic Mean               | 3,954               | 0.46                      |

TABLE S1d Pinilla et. al.<sup>16</sup>

| Mixture              |  | IC <sub>50</sub> nM | Mixture              |
|----------------------|--|---------------------|----------------------|
| YGGXXX-NH2           |  | 1,000               | YGFXXX-NH2           |
| Constituent Mixtures |  | IC <sub>50</sub> nM | Constituent Mixtures |
| YGGFXX-NH2           |  | 48                  | YGFLXX-NH2           |
| YGGLXX-NH2           |  | 1,160               | YGFWXX-NH2           |
| YGGWXX-NH2           |  | 6,840               | YGFMXX-NH2           |
| YGGIXX-NH2           |  | 18,220              | YGFIXX-NH2           |
| YGGMXX-NH2           |  | 26,680              | YGFTXX-NH2           |
| YGGYXX-NH2           |  | 98,220              | YGFFXX-NH2           |
| YGGRXX-NH2           |  | 179,780             | YGFSXX-NH2           |
| YGGGXX-NH2           |  | 253,500             | YGFRXX-NH2           |
| YGGTXX-NH2           |  | 399,620             | YGFYXX-NH2           |
| YGGVXX-NH2           |  | 517,060             | YGFEXX-NH2           |
| YGGQXX-NH2           |  | 732,040             | YGFDXX-NH2           |
| YGGAXX-NH2           |  | 800,000             | YGFQXX-NH2           |
| YGGPXX-NH2           |  | 1,081,160           | YGFVXX-NH2           |
| YGGHXX-NH2           |  | 1,232,200           | YGFNXX-NH2           |
| YGGSXX-NH2           |  | 1,690,580           | YGFHXX-NH2           |
| YGGNXX-NH2           |  | 1,750,000           | YGFAXX-NH2           |
| YGGEXX-NH2           |  | 1,750,000           | YFGGXX-NH2           |
| YGGKXX-NH2           |  | 1,750,000           | YGFPXX-NH2           |
| YGGDXX-NH2           |  | 1,750,000           | YGFKXX-NH2           |
|                      |  | Predicted Value     | Scaled Error         |
| Arithmetic Mean      |  | 738,795             | 737.80               |
| Geometric Mean       |  | 168,921             | 167.92               |
| Harmonic Mean        |  | 865                 | 0.14                 |

TABLE S1e Houghten et. al.<sup>17</sup>

| Mixture              |  | IC <sub>50</sub> nM | Mixture              |
|----------------------|--|---------------------|----------------------|
| Ac-PYXXXX-NH2        |  | 20,000              | Ac-PYPXXX-NH2        |
| Constituent Mixtures |  | IC <sub>50</sub> nM | Constituent Mixtures |
| Ac-PYPXXX-NH2        |  | 860                 | Ac-PYPNXX-NH2        |
| Ac-PYGXXX-NH2        |  | 12,056              | Ac-PYPHXX-NH2        |
| Ac-PYQXXX-NH2        |  | 20,104              | Ac-PYPGXX-NH2        |
| Ac-PYAXXX-NH2        |  | 39,380              | Ac-PYPTXX-NH2        |
| Ac-PYKXXX-NH2        |  | 72,320              | Ac-PYPQXX-NH2        |
| Ac-PYHXXX-NH2        |  | 85,640              | Ac-PYPAXX-NH2        |
| Ac-PYLXXX-NH2        |  | 89,920              | Ac-PYPDXX-NH2        |
| Ac-PYRXXX-NH2        |  | 102,120             | Ac-PYPEXX-NH2        |
| Ac-PYSXXX-NH2        |  | 152,000             | Ac-PYPFXX-NH2        |
| Ac-PYMXXX-NH2        |  | 162,000             | Ac-PYPIXX-NH2        |
| Ac-PYNXXX-NH2        |  | 194,000             | Ac-PYPKXX-NH2        |
| Ac-PYYXXX-NH2        |  | 256,000             | Ac-PYPLXX-NH2        |

|                 |           |              |                 |
|-----------------|-----------|--------------|-----------------|
| Ac-PYTXXX-NH2   | 268,000   |              | Ac-PYPMXX-NH2   |
| Ac-PYEXXX-NH2   | 392,000   |              | Ac-PYPPXX-NH2   |
| Ac-PYIXXX-NH2   | 446,000   |              | Ac-PYPRXX-NH2   |
| Ac-PYVXXX-NH2   | 792,000   |              | Ac-PYPSXX-NH2   |
| Ac-PYFXXX-NH2   | 876,000   |              | Ac-PYPVXX-NH2   |
| Ac-PYWXXX-NH2   | 1,420,000 |              | Ac-PYPWXX-NH2   |
| Ac-PYDXXX-NH2   | 1,420,000 |              | Ac-PYPYXX-NH2   |
| Predicted Value |           | Scaled Error |                 |
| Arithmetic Mean | 357,916   | 16.90        | Arithmetic Mean |
| Geometric Mean  | 136,593   | 5.83         | Geometric Mean  |
| Harmonic Mean   | 13,557    | 0.32         | Harmonic Mean   |

TABLE S1f Appel et. al.<sup>18</sup>

| Mixture              | IC <sub>50</sub> nM |                     | Mixture              |
|----------------------|---------------------|---------------------|----------------------|
| Ac-YPXXXX-NH2        | 200,000             |                     | Ac-YPNXXX-NH2        |
| Constituent Mixtures |                     | IC <sub>50</sub> nM | Constituent Mixtures |
| Ac-YPNXXX-NH2        | 7,329               |                     | Ac- YPNLXX-NH2       |
| Ac- YPYXXX-NH2       | 12,780              |                     | Ac- YPNIXX-NH2       |
| Ac-YPAXXX-NH2        | 1,400,000           |                     | Ac- YPNMXX-NH2       |
| Ac- YPDXXX-NH2       | 1,400,000           |                     | Ac- YPNVXX-NH2       |
| Ac- YPEXXX-NH2       | 1,400,000           |                     | Ac- YPNFXX-NH2       |
| Ac- YPFXXX-NH2       | 1,400,000           |                     | Ac- YPNDXX-NH2       |
| Ac- YPGXXX-NH2       | 1,400,000           |                     | Ac- YPNTXX-NH2       |
| Ac- YPHXXX-NH2       | 1,400,000           |                     | Ac- YPNAXX-NH2       |
| Ac- YPIXXX-NH2       | 1,400,000           |                     | Ac- YPN8XX-NH2       |
| Ac- YPKXXX-NH2       | 1,400,000           |                     | Ac- YPNRXX-NH2       |
| Ac- YPLXXX-NH2       | 1,400,000           |                     | Ac- YPNWXX-NH2       |
| Ac- YPMXXX-NH2       | 1,400,000           |                     | Ac- YPNEXX-NH2       |
| Ac- YPPXXX-NH2       | 1,400,000           |                     | Ac- YPNGXX-NH2       |
| Ac- YPQXXX-NH2       | 1,400,000           |                     | Ac- YPNKXX-NH2       |
| Ac- YPRXXX-NH2       | 1,400,000           |                     | Ac- YPNHXX-NH2       |
| Ac- YPSXXX-NH2       | 1,400,000           |                     | Ac- YPNQXX-NH2       |
| Ac- YPTXXX-NH2       | 1,400,000           |                     | Ac- YPNPXX-NH2       |
| Ac- YPVXXX-NH2       | 1,400,000           |                     | Ac- YPNNXX-NH2       |
| Ac- YPWXXX-NH2       | 1,400,000           |                     | Ac- YPNYXX-NH2       |
| Predicted Value      |                     | Scaled Error        |                      |
| Arithmetic Mean      | 1,253,690           | 5.27                | Arithmetic Mean      |
| Geometric Mean       | 829,323             | 3.15                | Geometric Mean       |
| Harmonic Mean        | 83,762              | 0.58                | Harmonic Mean        |

TABLE S1g Davis et. al.<sup>19</sup>

| Mixture              | IC <sub>50</sub> uM |                     | Mixture              |
|----------------------|---------------------|---------------------|----------------------|
| (noC)XXXT            | 30                  |                     | (noC)(noC)XXT        |
| Constituent Mixtures |                     | IC <sub>50</sub> uM | Constituent Mixtures |

|                 |     |              |                    |
|-----------------|-----|--------------|--------------------|
| (noC)(dG)XXT    | 100 |              | (noC)(noC)(dG)XT   |
| (noC)(T)XXT     | 100 |              | (noC)(noC)(T)XT    |
| (noC)(mA)XXT    | 100 |              | (noC)(noC)(mA)XT   |
| (noC)(mU)XXT    | 100 |              | (noC)(noC)(mU)XT   |
| (noC)(BT1)XXT   | 35  |              | (noC)(noC)(BT1)XT  |
| (noC)(BT2)XXT   | 100 |              | (noC)(noC)(BT2)XT  |
| (noC)(egNH)XXT  | 100 |              | (noC)(noC)(egNH)XT |
| (noC)(noC)XXT   | 20  |              | (noC)(noC)(noC)XT  |
| (noC)(mmU)XXT   | 100 |              | (noC)(noC)(mmU)XT  |
| (noC)(peG)XXT   | 35  |              | (noC)(noC)(peG)XT  |
| (noC)(egCB)XXT  | 100 |              | (noC)(noC)(egCB)XT |
| (noC)(egIM)XXT  | 100 |              | (noC)(noC)(egIM)XT |
| Predicted Value |     | Scaled Error |                    |
| Arithmetic Mean | 83  | 1.75         | Arithmetic Mean    |
| Geometric Mean  | 73  | 1.45         | Geometric Mean     |
| Harmonic Mean   | 61  | 1.03         | Harmonic Mean      |

TABLE S1h Ecker et. al.<sup>20</sup>

|                             |                           |                           |                             |
|-----------------------------|---------------------------|---------------------------|-----------------------------|
| <b>Mixture</b>              | <b>IC<sub>50</sub> uM</b> |                           | <b>Mixture</b>              |
| XXXXCXCXX                   | 4                         |                           | XXCXCXCXX                   |
| <b>Constituent Mixtures</b> |                           | <b>IC<sub>50</sub> uM</b> | <b>Constituent Mixtures</b> |
| XXAXCXCXX                   | 10                        |                           | XXCACXCXX                   |
| XXCXCXCXX                   | 0.5                       |                           | XXCCCXCXX                   |
| XXGXCXCXX                   | 10                        |                           | XXCGXCXCXX                  |
| XXUXCXCXX                   | 10                        |                           | XXCUCXCXX                   |
| Predicted Value             |                           | Scaled Error              |                             |
| Arithmetic Mean             | 7.6                       | 0.91                      | Arithmetic Mean             |
| Geometric Mean              | 4.7                       | 0.18                      | Geometric Mean              |
| Harmonic Mean               | 1.7                       | 0.57                      | Harmonic Mean               |

| IC <sub>50</sub> uM |              | Mixture              | IC <sub>50</sub> uM |              |
|---------------------|--------------|----------------------|---------------------|--------------|
| 41                  |              | Ac-DVPDXX-NH2        | 4.4                 |              |
|                     |              |                      |                     |              |
| IC <sub>50</sub> uM |              | Constituent Mixtures | IC <sub>50</sub> uM |              |
| 4                   |              | Ac-DVPDYX-NH2        | 0.38                |              |
| 1400                |              | Ac-DVPDAX-NH2        | 1,400               |              |
| 1,400               |              | Ac-DVPDDX-NH2        | 1,400               |              |
| 1,400               |              | Ac-DVPDEX-NH2        | 1,400               |              |
| 1,400               |              | Ac-DVPDFX-NH2        | 1,400               |              |
| 1,400               |              | Ac-DVPDGX-NH2        | 1,400               |              |
| 1,400               |              | Ac-DVPDHX-NH2        | 1,400               |              |
| 1,400               |              | Ac-DVPDIX-NH2        | 1,400               |              |
| 1,400               |              | Ac-DVPDKX-NH2        | 1,400               |              |
| 1,400               |              | Ac-DVPDLX-NH2        | 1,400               |              |
| 1,400               |              | Ac-DVPDMX-NH2        | 1,400               |              |
| 1,400               |              | Ac-DVPDNX-NH2        | 1,400               |              |
| 1,400               |              | Ac-DVPDPX-NH2        | 1,400               |              |
| 1,400               |              | Ac-DVPDQX-NH2        | 1,400               |              |
| 1,400               |              | Ac-DVPDRX-NH2        | 1,400               |              |
| 1,400               |              | Ac-DVPDSX-NH2        | 1,400               |              |
| 1,400               |              | Ac-DVPDTX-NH2        | 1,400               |              |
| 1,400               |              | Ac-DVPDVX-NH2        | 1,400               |              |
| Predicted Value     | Scaled Error |                      | Predicted Value     | Scaled Error |
| 1,322               | 31.26        | Arithmetic Mean      | 1,322               | 299.51       |
| 1,016               | 23.79        | Geometric Mean       | 887                 | 200.63       |
| 75                  | 0.83         | Harmonic Mean        | 7                   | 0.55         |

| IC <sub>50</sub> nM |  | Mixture                   | IC <sub>50</sub> nM |  |
|---------------------|--|---------------------------|---------------------|--|
| 1,500               |  | Ac-rfwixx-NH <sub>2</sub> | 480                 |  |
|                     |  |                           |                     |  |
| IC <sub>50</sub> nM |  | Constituent Mixtures      | IC <sub>50</sub> nM |  |
| 400                 |  | Ac-rfwinx-NH <sub>2</sub> | 200                 |  |
| 500                 |  | Ac-rfwiax-NH <sub>2</sub> | 350                 |  |
| 1,000               |  | Ac-rfwikx-NH <sub>2</sub> | 370                 |  |
| 1,000               |  | Ac-rfwirx-NH <sub>2</sub> | 460                 |  |
| 1,000               |  | Ac-rfwisx-NH <sub>2</sub> | 490                 |  |
| 1,500               |  | Ac-rfwimx-NH <sub>2</sub> | 500                 |  |
| 2,000               |  | Ac-rfwifx-NH <sub>2</sub> | 690                 |  |
| 2,300               |  | Ac-rfwilx-NH <sub>2</sub> | 700                 |  |
| 2,400               |  | Ac-rfwitx-NH <sub>2</sub> | 780                 |  |

|                 |              |                            |                 |              |
|-----------------|--------------|----------------------------|-----------------|--------------|
| 2,400           |              | Ac-rfwigx-NH <sub>2</sub>  | 1,100           |              |
| 2,700           |              | Ac-rfwiwix-NH <sub>2</sub> | 1,200           |              |
| 2,800           |              | Ac-rfwihx-NH <sub>2</sub>  | 1,300           |              |
| 3,700           |              | Ac-rfwivx-NH <sub>2</sub>  | 1,500           |              |
| 3,800           |              | Ac-rfwiyx-NH <sub>2</sub>  | 1,500           |              |
| 4,200           |              | Ac-rfwiqx-NH <sub>2</sub>  | 2,300           |              |
| 4,400           |              | Ac-rfwix-NH <sub>2</sub>   | 2,800           |              |
| 4,500           |              | Ac-rfwipx-NH <sub>2</sub>  | 3,700           |              |
| 15,000          |              | Ac-rfwidx-NH <sub>2</sub>  | 8,000           |              |
| 33,000          |              | Ac-rfwieix-NH <sub>2</sub> | 11,000          |              |
| Predicted Value | Scaled Error |                            | Predicted Value | Scaled Error |
| 4,663           | 2.11         | Arithmetic Mean            | 2,049           | 3.27         |
| 2,494           | 0.66         | Geometric Mean             | 1,122           | 1.34         |
| 1,586           | 0.06         | Harmonic Mean              | 729             | 0.52         |

| IC <sub>50</sub> nM |              | Mixture                   | IC <sub>50</sub> nM |              |
|---------------------|--------------|---------------------------|---------------------|--------------|
| 907                 |              | Ac-RFMWXX-NH <sub>2</sub> | 106                 |              |
|                     |              |                           |                     |              |
| IC <sub>50</sub> nM |              | Constituent Mixtures      | IC <sub>50</sub> nM |              |
| 174                 |              | Ac-RFMWMX-NH <sub>2</sub> | 30                  |              |
| 541                 |              | Ac-RFMWVX-NH <sub>2</sub> | 54                  |              |
| 595                 |              | Ac-RFMWQX-NH <sub>2</sub> | 83                  |              |
| 641                 |              | Ac-RFMWIX-NH <sub>2</sub> | 108                 |              |
| 730                 |              | Ac-RFMWYX-NH <sub>2</sub> | 125                 |              |
| 790                 |              | Ac-RFMWLX-NH <sub>2</sub> | 180                 |              |
| 870                 |              | Ac-RFMWRX-NH <sub>2</sub> | 187                 |              |
| 882                 |              | Ac-RFMWAX-NH <sub>2</sub> | 204                 |              |
| 927                 |              | Ac-RFMWKX-NH <sub>2</sub> | 210                 |              |
| 1,048               |              | Ac-RFMWGX-NH <sub>2</sub> | 313                 |              |
| 1,169               |              | Ac-RFMWTX-NH <sub>2</sub> | 321                 |              |
| 1,310               |              | Ac-RFMWSX-NH <sub>2</sub> | 327                 |              |
| 1,375               |              | Ac-RFMWWX-NH <sub>2</sub> | 327                 |              |
| 1,468               |              | Ac-RFMWHX-NH <sub>2</sub> | 348                 |              |
| 1,908               |              | Ac-RFMWFX-NH <sub>2</sub> | 378                 |              |
| 2,004               |              | Ac-RFMWNX-NH <sub>2</sub> | 454                 |              |
| 2,166               |              | Ac-RFMWPX-NH <sub>2</sub> | 616                 |              |
| 2,626               |              | Ac-RFMWEX-NH <sub>2</sub> | 795                 |              |
| 3,912               |              | Ac-RFMWDX-NH <sub>2</sub> | 952                 |              |
| Predicted Value     | Scaled Error |                           | Predicted Value     | Scaled Error |
| 1,323               | 0.46         | Arithmetic Mean           | 316                 | 1.99         |
| 1,077               | 0.19         | Geometric Mean            | 231                 | 1.18         |
| 828                 | 0.09         | Harmonic Mean             | 151                 | 0.42         |

| IC <sub>50</sub> nM |              | Mixture              | IC <sub>50</sub> nM |              |
|---------------------|--------------|----------------------|---------------------|--------------|
| 400                 |              | YGGFXX-NH2           | 48                  |              |
| IC <sub>50</sub> nM |              | Constituent Mixtures | IC <sub>50</sub> nM |              |
| 400                 |              | YGGFMX-NH2           | 6.6                 |              |
| 400                 |              | YGGFIX-NH2           | 7.2                 |              |
| 1,400               |              | YGGFLX-NH2           | 8.8                 |              |
| 1,520               |              | YGGFTX-NH2           | 22                  |              |
| 1,660               |              | YGGFSX-NH2           | 28                  |              |
| 2,300               |              | YGGFFX-NH2           | 28                  |              |
| 3,420               |              | YGGFQX-NH2           | 28                  |              |
| 3,640               |              | YGGFYX-NH2           | 34                  |              |
| 3,760               |              | YGGFHX-NH2           | 34                  |              |
| 3,840               |              | YGGFEX-NH2           | 36                  |              |
| 3,960               |              | YGGFNX-NH2           | 38                  |              |
| 4,140               |              | YGGFVX-NH2           | 50                  |              |
| 4,880               |              | YGGFGX-NH2           | 56                  |              |
| 5,060               |              | YGGFDX-NH2           | 56                  |              |
| 5,300               |              | YGGFAX-NH2           | 62                  |              |
| 5,860               |              | YGGFWX-NH2           | 64                  |              |
| 7,160               |              | YGGFKX-NH2           | 146                 |              |
| 7,980               |              | YGGFRX-NH2           | 246                 |              |
| 14,400              |              | YGGFPX-NH2           | 352                 |              |
| Predicted Value     | Scaled Error |                      | Predicted Value     | Scaled Error |
| 4,267               | 9.67         | Arithmetic Mean      | 69                  | 0.43         |
| 3,118               | 6.79         | Geometric Mean       | 40                  | 0.17         |
| 1,882               | 3.71         | Harmonic Mean        | 25                  | 0.49         |

| IC <sub>50</sub> nM |  | Mixture              | IC <sub>50</sub> nM |  |
|---------------------|--|----------------------|---------------------|--|
| 860                 |  | Ac-PYPNXX-NH2        | 90                  |  |
| IC <sub>50</sub> nM |  | Constituent Mixtures | IC <sub>50</sub> nM |  |
| 90                  |  | Ac-PYPNLX-NH2        | 6                   |  |
| 132,000             |  | Ac-PYPNVX-NH2        | 69                  |  |
| 136,000             |  | Ac-PYPNMX-NH2        | 85                  |  |
| 240,000             |  | Ac-PYPNIX-NH2        | 88                  |  |
| 318,000             |  | Ac-PYPNFX-NH2        | 461                 |  |
| 1,420,000           |  | Ac-PYPNXX-NH2        | 615                 |  |
| 1,420,000           |  | Ac-PYPNTX-NH2        | 3,662               |  |
| 1,420,000           |  | Ac-PYPNAX-NH2        | 4,719               |  |
| 1,420,000           |  | Ac-PYPNHX-NH2        | 8,138               |  |
| 1,420,000           |  | Ac-PYPNSX-NH2        | 8,447               |  |
| 1,420,000           |  | Ac-PYPNYX-NH2        | 9,307               |  |
| 1,420,000           |  | Ac-PYPNQX-NH2        | 10,663              |  |



|                 |              |                 |                 |              |
|-----------------|--------------|-----------------|-----------------|--------------|
| 1,420,000       |              | Ac-PYPNWX-NH2   | 12,625          |              |
| 1,420,000       |              | Ac-PYPNPX-NH2   | 36,759          |              |
| 1,420,000       |              | Ac-PYPNEX-NH2   | 67,596          |              |
| 1,420,000       |              | Ac-PYPNGX-NH2   | 89,080          |              |
| 1,420,000       |              | Ac-PYPNKX-NH2   | 91,700          |              |
| 1,420,000       |              | Ac-PYPNDX-NH2   | 113,446         |              |
| 1,420,000       |              | Ac-PYPNRX-NH2   | 183,400         |              |
| Predicted Value | Scaled Error |                 | Predicted Value | Scaled Error |
| 1,089,794       | 1266.20      | Arithmetic Mean | 33,730          | 373.78       |
| 560,506         | 650.75       | Geometric Mean  | 4,149           | 45.10        |
| 1,705           | 0.98         | Harmonic Mean   | 91              | 0.01         |

|                           |              |                             |                           |              |
|---------------------------|--------------|-----------------------------|---------------------------|--------------|
| <b>IC<sub>50</sub> nM</b> |              | <b>Mixture</b>              | <b>IC<sub>50</sub> nM</b> |              |
| 7,329                     |              | Ac- YPNLXX-NH2              | 376                       |              |
| <b>IC<sub>50</sub> nM</b> |              | <b>Constituent Mixtures</b> | <b>IC<sub>50</sub> nM</b> |              |
| 376                       |              | Ac- YPNLPX-NH2              | 164                       |              |
| 4,710                     |              | Ac- YPNLSX-NH2              | 257                       |              |
| 5,500                     |              | Ac- YPNLQX-NH2              | 276                       |              |
| 7,700                     |              | Ac-YPNLRX-NH2               | 292                       |              |
| 30,000                    |              | Ac- YPNLEX-NH2              | 339                       |              |
| 31,000                    |              | Ac-YPNLTX-NH2               | 348                       |              |
| 112,000                   |              | Ac- YPNLGX-NH2              | 358                       |              |
| 374,000                   |              | Ac- YPNLDX-NH2              | 379                       |              |
| 1,400,000                 |              | Ac- YPNLMX-NH2              | 389                       |              |
| 1,400,000                 |              | Ac- YPNLKX-NH2              | 420                       |              |
| 1,400,000                 |              | Ac: YPNLNX-NH2              | 499                       |              |
| 1,400,000                 |              | Ac- YPNLAX-NH2              | 529                       |              |
| 1,400,000                 |              | Ac-YPNLVX-NH2               | 533                       |              |
| 1,400,000                 |              | Ac- YPNLHX-NH2              | 601                       |              |
| 1,400,000                 |              | Ac- YPNLIX-NH2              | 614                       |              |
| 1,400,000                 |              | Ac- YPNLFX-NH2              | 797                       |              |
| 1,400,000                 |              | Ac-YPNLYX-NH2               | 841                       |              |
| 1,400,000                 |              | Ac- YPNLLX-NH2              | 858                       |              |
| 1,400,000                 |              | Ac-YPNLWX-NH2               | 1,274                     |              |
| Predicted Value           | Scaled Error |                             | Predicted Value           | Scaled Error |
| 840,278                   | 113.65       | Arithmetic Mean             | 514                       | 0.37         |
| 208,754                   | 27.48        | Geometric Mean              | 456                       | 0.21         |
| 5,813                     | 0.21         | Harmonic Mean               | 407                       | 0.08         |

|                           |  |
|---------------------------|--|
| <b>IC<sub>50</sub> uM</b> |  |
| 20                        |  |
| <b>IC<sub>50</sub> uM</b> |  |

|                 |              |
|-----------------|--------------|
| 10              |              |
| 50              |              |
| 50              |              |
| 50              |              |
| 50              |              |
| 50              |              |
| 50              |              |
| 20              |              |
| 45              |              |
| 15              |              |
| 50              |              |
| 50              |              |
| Predicted Value | Scaled Error |
| 41              | 1.04         |
| 36              | 0.82         |
| 30              | 0.50         |

| <b>IC<sub>50</sub> uM</b> |              | <b>Mixture</b>              | <b>IC<sub>50</sub> uM</b> |              |
|---------------------------|--------------|-----------------------------|---------------------------|--------------|
| 0.5                       |              | XXCCCXCXX                   | 0.15                      |              |
|                           |              |                             |                           |              |
| <b>IC<sub>50</sub> uM</b> |              | <b>Constituent Mixtures</b> | <b>IC<sub>50</sub> uM</b> |              |
| 10                        |              | XXCCCACXX                   | 0.08                      |              |
| 0.15                      |              | XXXXXXXXXX                  | 1                         |              |
| 10                        |              | XXXXCGCXX                   | 0.4                       |              |
| 10                        |              | XXXXCUCXX                   | 1                         |              |
| Predicted Value           | Scaled Error |                             | Predicted Value           | Scaled Error |
| 7.54                      | 14.08        | Arithmetic Mean             | 0.62                      | 3.13         |
| 3.50                      | 6.00         | Geometric Mean              | 0.42                      | 1.82         |
| 0.57                      | 0.15         | Harmonic Mean               | 0.24                      | 0.57         |

| Mixture                      | IC <sub>50</sub> uM |              |
|------------------------------|---------------------|--------------|
| Ac-DVPDYX-NH <sub>2</sub>    | 0.38                |              |
| <b>Constituent Compounds</b> |                     |              |
| Constituents                 | IC <sub>50</sub> uM |              |
| Ac-DVPDYA-NH <sub>2</sub>    | 0.03                |              |
| Ac-DVPDYS-NH <sub>2</sub>    | 0.27                |              |
| Ac-DVPDYV-NH <sub>2</sub>    | 1.1                 |              |
| Ac-DVPDYT-NH <sub>2</sub>    | 1.5                 |              |
| Ac-DVPDYG-NH <sub>2</sub>    | 1.6                 |              |
| Ac-DVPDYE-NH <sub>2</sub>    | 4.06                |              |
| Ac-DVPDYI-NH <sub>2</sub>    | 5.29                |              |
| Ac-DVPDYM-NH <sub>2</sub>    | 7.7                 |              |
| Ac-DVPDYQ-NH <sub>2</sub>    | 8.18                |              |
| Ac-DVPDYH-NH <sub>2</sub>    | 8.99                |              |
| Ac-DVPDYL-NH <sub>2</sub>    | 9.98                |              |
| Ac-DVPDYR-NH <sub>2</sub>    | 10.9                |              |
| Ac-DVPDYF-NH <sub>2</sub>    | 12.02               |              |
| Ac-DVPDYN-NH <sub>2</sub>    | 15.56               |              |
| Ac-DVPDYK-NH <sub>2</sub>    | 17.6                |              |
| Ac-DVPDYY-NH <sub>2</sub>    | 22.48               |              |
| Ac-DVPDYP-NH <sub>2</sub>    | 26.14               |              |
| Ac-DVPDYD-NH <sub>2</sub>    | 48                  |              |
|                              | Predicted Value     | Scaled Error |
| Arithmetic Mean              | 11                  | 28.44        |
| Geometric Mean               | 5                   | 11.89        |
| Harmonic Mean                | 0                   | 0.17         |

| Mixture                      | IC <sub>50</sub> nM |  |
|------------------------------|---------------------|--|
| Ac-rfwinx-NH <sub>2</sub>    | 110                 |  |
| <b>Constituent Compounds</b> |                     |  |
| Constituents                 | IC <sub>50</sub> nM |  |
| Ac-rfwink-NH <sub>2</sub>    | 18                  |  |
| Ac-rfwir-NH <sub>2</sub>     | 27                  |  |
| Ac-rfwina-NH <sub>2</sub>    | 37                  |  |
| Ac-rfwins-NH <sub>2</sub>    | 130                 |  |
| Ac-rfwinp-NH <sub>2</sub>    | 130                 |  |
| Ac-rfwinn-NH <sub>2</sub>    | 130                 |  |
| Ac-rfwinq-NH <sub>2</sub>    | 140                 |  |
| Ac-rfwing-NH <sub>2</sub>    | 170                 |  |
| Ac-rfwim-NH <sub>2</sub>     | 180                 |  |

|                           |                 |              |
|---------------------------|-----------------|--------------|
| Ac-rfwinh-NH <sub>2</sub> | 200             |              |
| Ac-rfwint-NH <sub>2</sub> | 230             |              |
| Ac-rfwihy-NH <sub>2</sub> | 460             |              |
| Ac-rfwini-NH <sub>2</sub> | 680             |              |
| Ac-rfwinf-NH <sub>2</sub> | 770             |              |
| Ac-rfwinw-NH <sub>2</sub> | 790             |              |
| Ac-rfwine-NH <sub>2</sub> | 960             |              |
| Ac-rfwind-NH <sub>2</sub> | 1,100           |              |
| Ac-rfwinv-NH <sub>2</sub> | 1,300           |              |
| Ac-rfwini-NH <sub>2</sub> | 5,600           |              |
|                           | Predicted Value | Scaled Error |
| Arithmetic Mean           | 687             | 5.24         |
| Geometric Mean            | 265             | 1.41         |
| Harmonic Mean             | 106             | 0.04         |

| Mixture                   | IC <sub>50</sub> nM |              |
|---------------------------|---------------------|--------------|
| Ac-RFMWMX-NH <sub>2</sub> | 24                  |              |
|                           |                     |              |
| Constituent Compounds     | IC <sub>50</sub> nM |              |
| Ac-RFMWMK-NH <sub>2</sub> | 5                   |              |
| Ac-RFMWMT-NH <sub>2</sub> | 5                   |              |
| Ac-RFMWMR-NH <sub>2</sub> | 6                   |              |
| Ac-RFMWMS-NH <sub>2</sub> | 7                   |              |
| Ac-RFMWVG-NH <sub>2</sub> | 10                  |              |
| Ac-RFMWMN-NH <sub>2</sub> | 11                  |              |
| Ac-RFMWMQ-NH <sub>2</sub> | 12                  |              |
| Ac-RFMWMA-NH <sub>2</sub> | 15                  |              |
| Ac-RFMWMV-NH <sub>2</sub> | 17                  |              |
| Ac-RFMWMY-NH <sub>2</sub> | 17                  |              |
| Ac-RFMWMM-NH <sub>2</sub> | 18                  |              |
| Ac-RFMWML-NH <sub>2</sub> | 20                  |              |
| Ac-RFMWMH-NH <sub>2</sub> | 20                  |              |
| Ac-RFMWMP-NH <sub>2</sub> | 24                  |              |
| Ac-RFMWMW-NH <sub>2</sub> | 46                  |              |
| Ac-RFMWMI-NH <sub>2</sub> | 67                  |              |
| Ac-RFMWMF-NH <sub>2</sub> | 68                  |              |
| Ac-RFMWME-NH <sub>2</sub> | 96                  |              |
| Ac-RFMWMD-NH <sub>2</sub> | 109                 |              |
|                           | Predicted Value     | Scaled Error |
| Arithmetic Mean           | 30                  | 0.26         |
| Geometric Mean            | 19                  | 0.20         |
| Harmonic Mean             | 13                  | 0.45         |

| Mixture               | IC <sub>50</sub> nM |              |
|-----------------------|---------------------|--------------|
| YGGFMX-NH2            | 6.6                 |              |
|                       |                     |              |
| Constituent Compounds | IC <sub>50</sub> nM |              |
| YGGFMT-NH2            | 3.2                 |              |
| YGGFMS-NH2            | 4.3                 |              |
| YGGFME-NH2            | 4.4                 |              |
| YGGFML-NH2            | 6                   |              |
| YGGFMR-NH2            | 6                   |              |
| YGGFMN-NH2            | 6.2                 |              |
| YGGFMK-NH2            | 6.3                 |              |
| YGGFMI-NH2            | 6.3                 |              |
| YGGFMA-NH2            | 6.7                 |              |
| YGGFMH-NH2            | 7.1                 |              |
| YGGFMP-NH2            | 7.1                 |              |
| YGGFMV-NH2            | 7.4                 |              |
| YGGFMD-NH2            | 7.5                 |              |
| YGGFMG-NH2            | 7.7                 |              |
| YGGFMQ-NH2            | 8.3                 |              |
| YGGFMM-NH2            | 11.3                |              |
| YGGFMY-NH2            | 16                  |              |
| YGGFMF-NH2            | 25.8                |              |
| YGGFMW-NH2            | 25.8                |              |
|                       | Predicted Value     | Scaled Error |
| Arithmetic Mean       | 9.1                 | 0.38         |
| Geometric Mean        | 7.7                 | 0.17         |
| Harmonic Mean         | 6.9                 | 0.04         |

| Mixture               | IC <sub>50</sub> nM |  |
|-----------------------|---------------------|--|
| Ac-PYPNLX-NH2         | 6                   |  |
|                       |                     |  |
| Constituent Compounds | IC <sub>50</sub> nM |  |
| Ac-PYPNLP-NH2         | 4                   |  |
| Ac-PYPNLT-NH2         | 5                   |  |
| Ac-PYPNLS-NH2         | 6                   |  |
| Ac-PYPNLQ-NH2         | 8                   |  |
| Ac-PYPNLG-NH2         | 9                   |  |
| Ac-PYPNLA-NH2         | 9                   |  |
| Ac-PYPNLH-NH2         | 9                   |  |
| Ac-PYPNLK-NH2         | 9                   |  |
| Ac-PYPNLD-NH2         | 11                  |  |
| Ac-PYPNLE-NH2         | 12                  |  |
| Ac-PYPNLI-NH2         | 13                  |  |
| Ac-PYPNLN-NH2         | 14                  |  |

|                 |    |              |
|-----------------|----|--------------|
| Ac-PYPNLM-NH2   | 15 |              |
| Ac-PYPNLR-NH2   | 17 |              |
| Ac-PYPNLL-NH2   | 17 |              |
| Ac-PYPNLF-NH2   | 18 |              |
| Ac-PYPNLW-NH2   | 29 |              |
| Ac-PYPNLY-NH2   | 35 |              |
| Ac-PYPNLV-NH2   | 39 |              |
| Predicted Value |    | Scaled Error |
| Arithmetic Mean | 15 | 1.45         |
| Geometric Mean  | 12 | 1.04         |
| Harmonic Mean   | 10 | 0.72         |

| Mixture                     | IC <sub>50</sub> nM | Mixture                     | IC <sub>50</sub> nM |
|-----------------------------|---------------------|-----------------------------|---------------------|
| Ac- YPNLSX-NH2              | 257                 | Ac- YPYXXX-NH2              | 12,780              |
| <b>Constituent Mixtures</b> |                     | <b>Constituent Mixtures</b> |                     |
| Ac-YPNLSX-NH2               | 257                 | Ac-YPYXXX-NH2               | 12,780              |
| Ac-YPNLSY-NH2               | 153                 | Ac-YPYGXX-NH2               | 34,000              |
| Ac-YPNLSH-NH2               | 157                 | Ac-YPYAXX-NH2               | 50,000              |
| Ac-YPNLSV-NH2               | 158                 | Ac-YPYKXX-NH2               | 108,000             |
| Ac-YPNLST-NH2               | 161                 | Ac-YPYNXX-NH2               | 186,000             |
| Ac-YPNLSD-NH2               | 177                 | Ac-YPYMXX-NH2               | 196,000             |
| Ac-YPNLSF-NH2               | 180                 | Ac-YPYHXX-NH2               | 314,000             |
| Ac-YPNLSQ-NH2               | 190                 | Ac-YPYRXX-NH2               | 378,000             |
| Ac-YPNLSK-NH2               | 223                 | Ac-YPYYXX-NH2               | 452,000             |
| Ac-YPNLSN-NH2               | 245                 | Ac-YPYDXX-NH2               | 546,000             |
| Ac-YPNLSM-NH2               | 250                 | Ac-YPYEXX-NH2               | 558,000             |
| Ac-YPNLSL-NH2               | 277                 | Ac-YPYSXX-NH2               | 618,000             |
| Ac-YPNLSW-NH2               | 301                 | Ac-YPYVXX-NH2               | 640,000             |
| Ac-YPNLSP-NH2               | 307                 | Ac-YPYTXX-NH2               | 740,000             |
| Ac-YPNLSR-NH2               | 311                 | Ac-YPYFXX-NH2               | 1,400,000           |
| Ac-YPNLSE-NH2               | 367                 | Ac-YPYWXX-NH2               | 1,400,000           |
| Ac-YPNLSA-NH2               | 429                 | Ac-YPYIXX-NH2               | 1,400,000           |
| Ac-YPNLSE-NH2               | 507                 | Ac-YPYLXX-NH2               | 1,400,000           |
| Ac-YPNLSI-NH2               | 1,151               | Ac-YPYQXX-NH2               | 1,400,000           |
| Predicted Value             |                     | Predicted Value             |                     |
| Arithmetic Mean             | 299                 | Arithmetic Mean             | 622,127             |
| Geometric Mean              | 255                 | Geometric Mean              | 292,158             |
| Harmonic Mean               | 230                 | Harmonic Mean               | 7,481               |

| Mixture              |  | IC <sub>50</sub> uM | Mixture              |  | IC <sub>50</sub> uM |
|----------------------|--|---------------------|----------------------|--|---------------------|
| XXCCCACXX            |  | 0.08                | XXCCCACAX            |  | 0.05                |
|                      |  |                     |                      |  |                     |
| Constituent Mixtures |  | IC <sub>50</sub> uM | Constituent Mixtures |  | IC <sub>50</sub> uM |
| XXCCCACAX            |  | 0.05                | XACCCACAX            |  | 0.1                 |
| XXCCCACCX            |  | 0.5                 | XCCCCACAX            |  | 0.1                 |
| XXCCCACGX            |  | 0.08                | XGCCCACAX            |  | 0.03                |
| XXCCCACUX            |  | 0.5                 | XUCCCACAX            |  | 0.1                 |
|                      |  | Predicted Value     |                      |  | Predicted Value     |
| Arithmetic Mean      |  | 0.28                | Scaled Error         |  | 2.53                |
| Geometric Mean       |  | 0.18                | Arithmetic Mean      |  | 0.08                |
| Harmonic Mean        |  | 0.11                | Geometric Mean       |  | 0.07                |
|                      |  |                     | Harmonic Mean        |  | 0.06                |









|              | Mixture              | IC <sub>50</sub> nM |              | Mixture               |
|--------------|----------------------|---------------------|--------------|-----------------------|
|              | Ac- YPYPXX-NH2       | 408                 |              | Ac-YPYPNX-NH2         |
|              |                      |                     |              |                       |
|              | Constituent Mixtures | IC <sub>50</sub> nM |              | Constituent Compounds |
|              | Ac-YPYPNX-NH2        | 37                  |              | Ac-YPYPNL-NH2         |
|              | Ac- YPYPHX-NH2       | 56,993              |              | Ac- YPYPNM-NH2        |
|              | Ac- YPYPGX-NH2       | 104,973             |              | Ac- YPYPNI-NH2        |
|              | Ac- YPYPQX-NH2       | 162,400             |              | Ac-YPYPNV-NH2         |
|              | Ac- YPYPIX-NH2       | 276,000             |              | Ac-YPYPNF-NH2         |
|              | Ac-YPYPFX-NH2        | 318,000             |              | Ac- YPYPNK-NH2        |
|              | Ac- YPYPEX-NH2       | 436,000             |              | Ac- YPYPNT-NH2        |
|              | Ac- YPYPTX-NH2       | 523,200             |              | Ac- YPYPNA-NH2        |
|              | Ac- YPYPDX-NH2       | 530,000             |              | Ac-YPYPNS-NH2         |
|              | Ac- YPYPSX-NH2       | 980,000             |              | Ac- YPYPNQ-NH2        |
|              | Ac- YPYPVX-NH2       | 1,400,000           |              | Ac- YPYPNH-NH2        |
|              | Ac- YPYPLX-NH2       | 1,400,000           |              | Ac-YPYPNP-NH2         |
|              | Ac- YPYPWX-NH2       | 1,400,000           |              | Ac-YPYPNY-NH2         |
|              | Ac-YPYPAX-NH2        | 1,400,000           |              | Ac-YPYPNW-NH2         |
|              | Ac- YPYPRX-NH2       | 1,400,000           |              | Ac- YPYPNN-NH2        |
|              | Ac- YPYPPX-NH2       | 1,400,000           |              | Ac-YPYPNG-NH2         |
|              | Ac- YPYPMX-NH2       | 1,400,000           |              | Ac-YPYPNR-NH2         |
|              | Ac- YPYPKX-NH2       | 1,400,000           |              | Ac- YPYPNE- NH2       |
|              | Ac- YPYPYX-NH2       | 1,400,000           |              | Ac- YPYPND-NH2        |
| Scaled Error |                      | Predicted Value     | Scaled Error |                       |
| 47.68        | Arithmetic Mean      | 841,453             | 2061.38      | Arithmetic Mean       |
| 21.86        | Geometric Mean       | 374,148             | 916.03       | Geometric Mean        |
| 0.41         | Harmonic Mean        | 702                 | 0.72         | Harmonic Mean         |

|              | <b>Mixture</b>              | <b>IC<sub>50</sub> uM</b> |              | <b>Mixture</b>               |
|--------------|-----------------------------|---------------------------|--------------|------------------------------|
|              | XGCCCACAX                   | 0.03                      |              | XGCCCACAC                    |
|              |                             |                           |              |                              |
|              | <b>Constituent Mixtures</b> | <b>IC<sub>50</sub> uM</b> |              | <b>Constituent Compounds</b> |
|              | XGCCCACAA                   | 0.05                      |              | AGCCCACAC                    |
|              | XGCCCACAC                   | 0.02                      |              | CGCCCACAC                    |
|              | XGCCCACAG                   | 0.05                      |              | GGCCCACAC                    |
|              | XGCCCACAU                   | 0.042                     |              | UGCCCACAC                    |
| Scaled Error |                             | Predicted Value           | Scaled Error |                              |
| 0.65         | Arithmetic Mean             | 0.041                     | 0.35         | Arithmetic Mean              |
| 0.48         | Geometric Mean              | 0.038                     | 0.27         | Geometric Mean               |
| 0.26         | Harmonic Mean               | 0.035                     | 0.17         | Harmonic Mean                |







| IC <sub>50</sub> nM |  |
|---------------------|--|
| 37                  |  |

| IC <sub>50</sub> nM |  |
|---------------------|--|
| 2                   |  |
| 14                  |  |
| 14                  |  |
| 20                  |  |
| 176                 |  |
| 357                 |  |
| 358                 |  |
| 427                 |  |
| 1,733               |  |
| 2,777               |  |
| 2,809               |  |
| 3,302               |  |
| 4,741               |  |
| 4,971               |  |
| 5,679               |  |
| 6,128               |  |
| 6,746               |  |
| 8,547               |  |
| 67,480              |  |

| Predicted Value | Scaled Error |
|-----------------|--------------|
| 6,120           | 164.41       |
| 788             | 20.29        |
| 27              | 0.28         |



| <b>IC<sub>50</sub> uM</b> |              |
|---------------------------|--------------|
| 0.02                      |              |
| <b>IC<sub>50</sub> uM</b> |              |
| 0.03                      |              |
| 0.05                      |              |
| 0.02                      |              |
| 0.01                      |              |
| Predicted Value           | Scaled Error |
| 0.028                     | 0.38         |
| 0.023                     | 0.17         |
| 0.020                     | 0.02         |
